# Supplementary material
Source: PubMed Central journal article supplement (PMC2754631)
Supplement: pp.109.142612_1.pdf [file pp.109.142612_1.pdf]

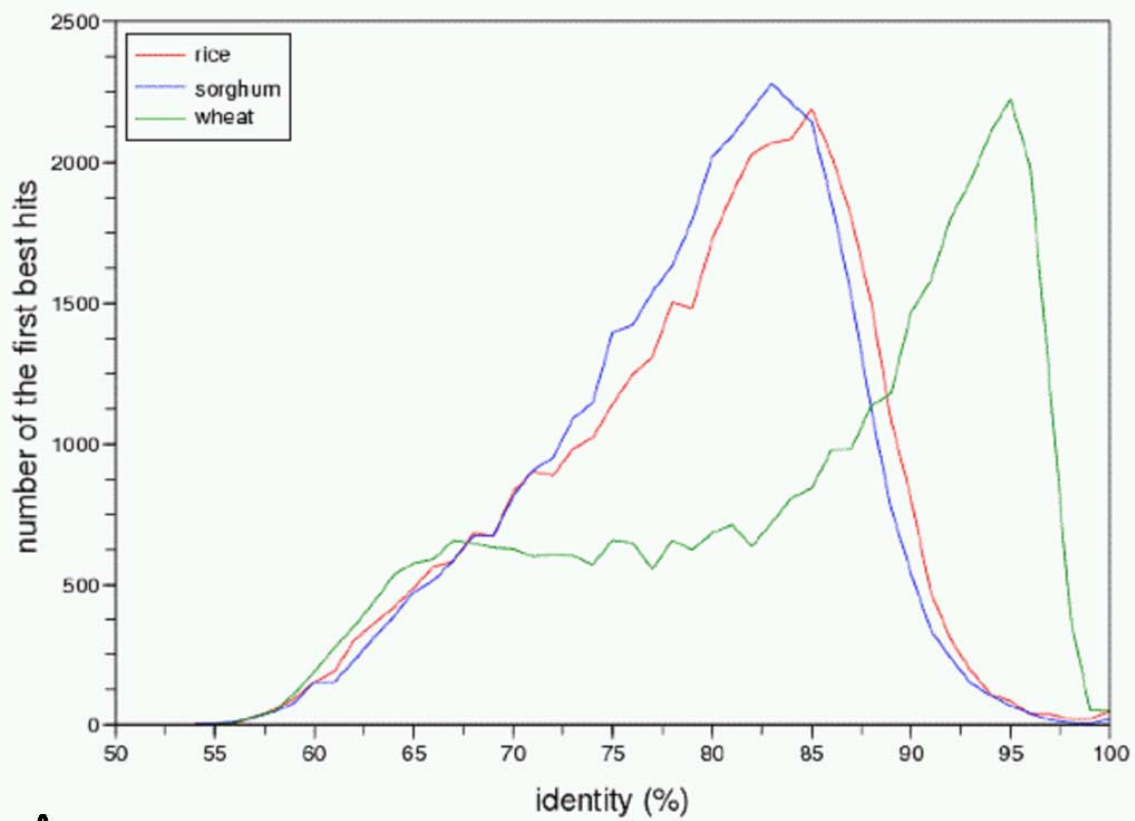

A

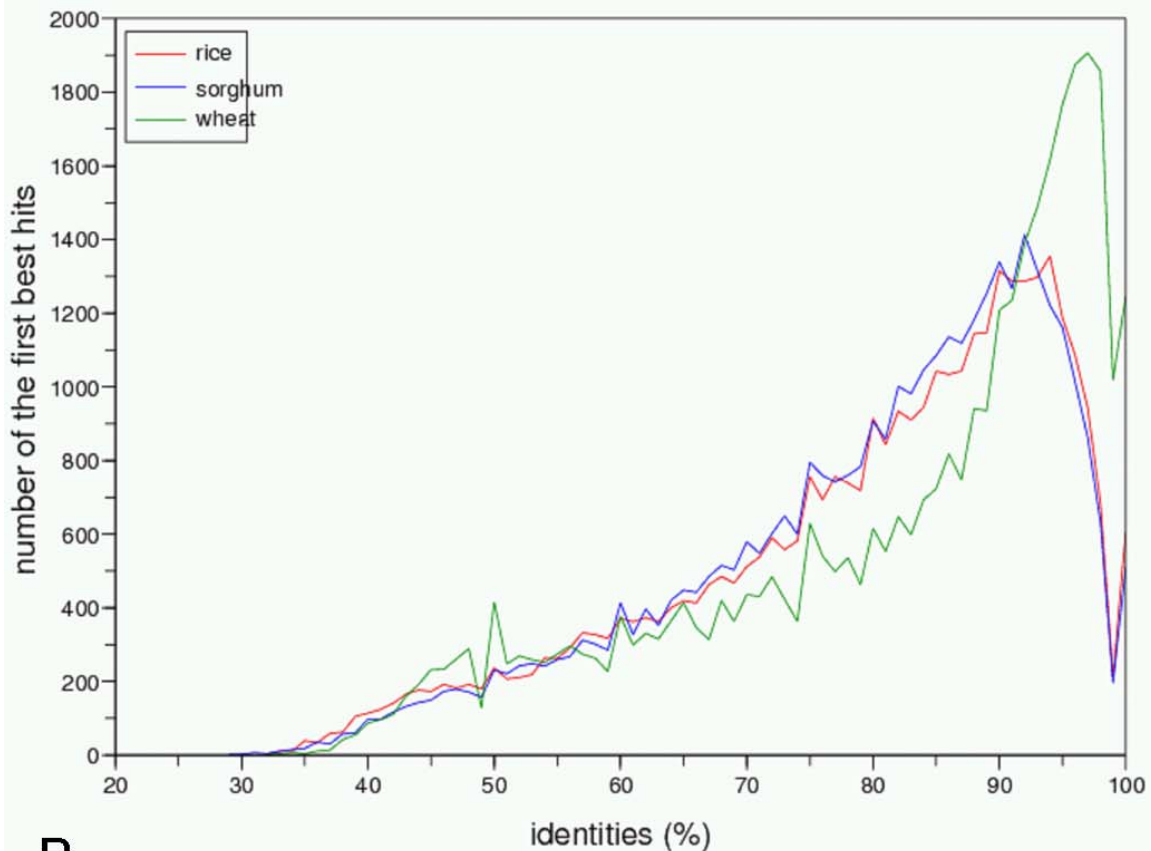

B

**Figure S1: Sequence comparisons of barley ESTs against wheat, rice and sorghum genes**

Barley HarvEST unigene assembly 35 have been compared against wheat EST clusters and the complete genome complements of rice and sorghum respectively. Nucleotide searches were undertaken using BLASTN (A) and TBLASTX (B) searches. The respective best matching homolog was selected. The observed identities are plotted on the x-axis
